# Supplementary material for: Positively charged carbon nanoparticulate/sodium dodecyl sulphate bilayer electrode for extraction and voltammetric determination of ciprofloxacin in real samples
Source: Royal Society of Chemistry journal article supplement (doi:10.1039/c6ra03170f), 2016-01-01
Supplement: c6ra03170f1.pdf [file c6ra03170f1.pdf]

Supplementary data

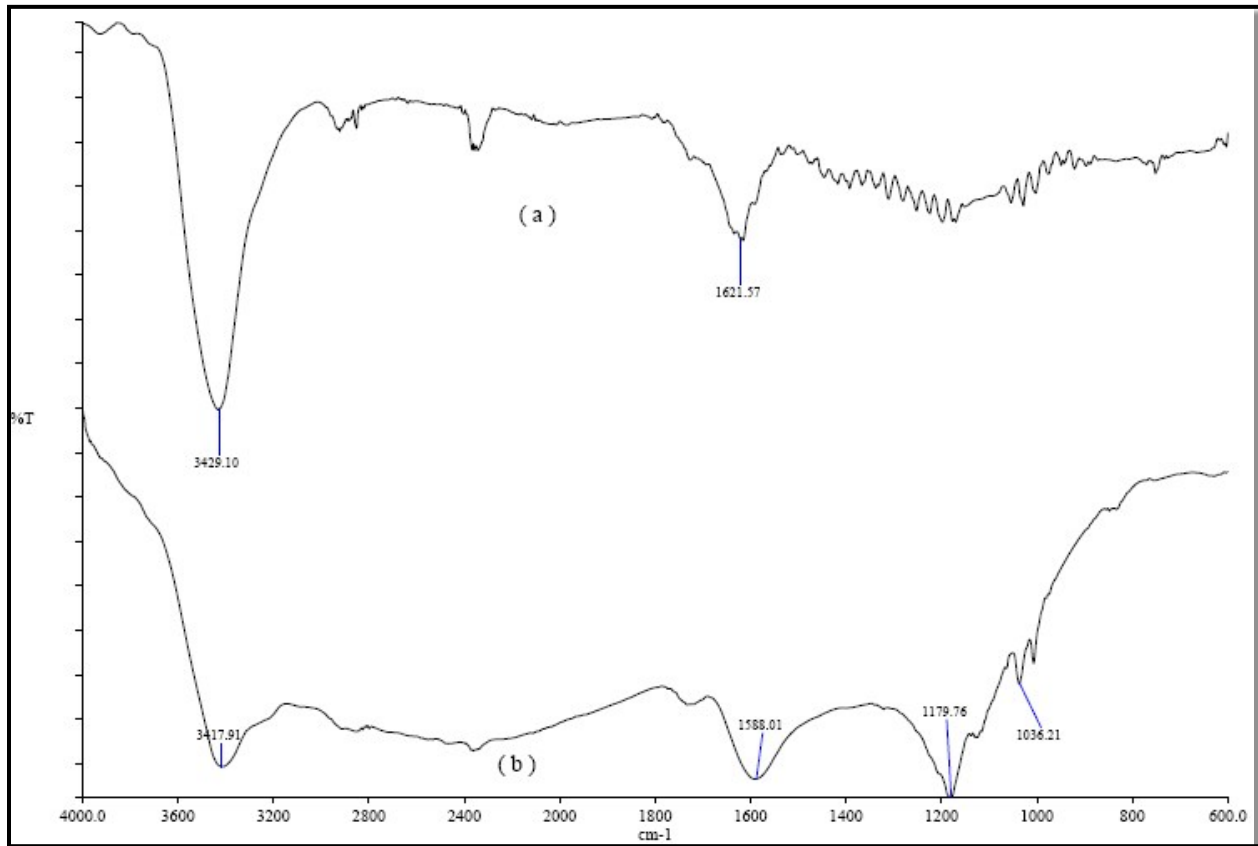

Supplementary data 1. FTIR spectra a) sulfonated-modified carbon nanoparticles b) sulfonamide-functionalized carbon nanoparticles

supplementary data S1

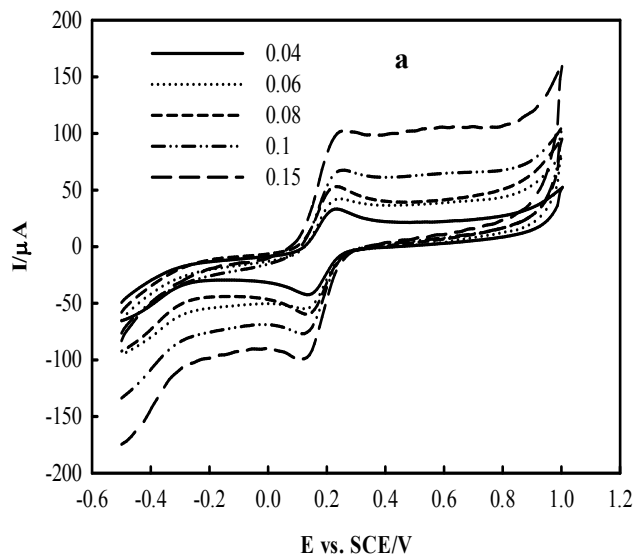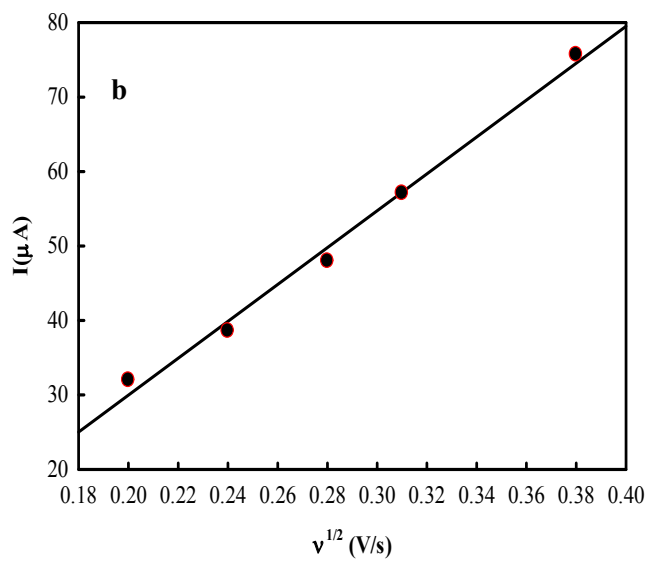

Supplementary Data 2. (a) Cyclic voltammograms (scan rate 0.04- 0.15  $\text{V s}^{-1}$ ) for the reduction of  $1 \times 10^{-4}$  M  $\text{Fe}(\text{CN})_6^{3-}$  in 0.1 M KCl. (b) The plot of  $I_{\text{pa}}$  versus  $v^{1/2}$ .
